# Supplementary material for: The genome of Pelobacter carbinolicus reveals surprising metabolic capabilities and physiological features
Source: PubMed Central journal article supplement (PMC3543383; doi:10.1186/1471-2164-13-690), 2012-12-10
Supplement: 1471-2164-13-690-S4.pdf [file 1471-2164-13-690-S4.pdf]

**Additional file 4: Table S3.** Thiamin and cobalamin biosynthesis genes of *P. carbinolicus*.

| Locus tag                                                                       | Gene symbol        | Annotation                                                                                                             |
|---------------------------------------------------------------------------------|--------------------|------------------------------------------------------------------------------------------------------------------------|
| <b>Common enzymes of thiamin/molybdopterin/iron-sulfur cluster biosynthesis</b> |                    |                                                                                                                        |
| Pcar_0050                                                                       | <i>nifS-1</i>      | nitrogen fixation iron-sulfur cluster assembly cysteine desulfurase NifS                                               |
| Pcar_0234                                                                       |                    | cysteine desulfurase family protein                                                                                    |
| Pcar_0304                                                                       |                    | cysteine desulfurase family protein                                                                                    |
| Pcar_1729                                                                       |                    | cysteine desulfurase family protein                                                                                    |
| Pcar_1841                                                                       |                    | cysteine desulfurase                                                                                                   |
| Pcar_1860                                                                       | <i>nifS-2</i>      | iron-sulfur cluster assembly cysteine desulfurase NifS                                                                 |
| Pcar_2513                                                                       | <i>thiF-1</i>      | thiamin biosynthesis thiocarboxylate synthase                                                                          |
| Pcar_0611                                                                       | <i>thiF-2</i>      | thiamin biosynthesis thiocarboxylate synthase                                                                          |
| Pcar_0338                                                                       | <i>thiS-1</i>      | thiamin biosynthesis sulfur carrier protein                                                                            |
| Pcar_0610                                                                       | <i>thiS-2</i>      | thiamin biosynthesis sulfur carrier protein                                                                            |
| Pcar_3369                                                                       | <i>thiS-3</i>      | thiamin biosynthesis sulfur carrier protein                                                                            |
| <b>Thiamin biosynthesis</b>                                                     |                    |                                                                                                                        |
| Pcar_0340                                                                       | <i>thiH-1</i>      | tyrosine lyase                                                                                                         |
| Pcar_0608                                                                       | <i>thiH-2</i>      | tyrosine lyase                                                                                                         |
| Pcar_0603                                                                       |                    | fumarylacetoacetate hydrolase family protein                                                                           |
| Pcar_0339                                                                       | <i>thiG-1</i>      | carboxythiazole phosphate tautomer synthase                                                                            |
| Pcar_0609                                                                       | <i>thiG-2</i>      | carboxythiazole phosphate tautomer synthase                                                                            |
| Pcar_0342                                                                       | <i>tenI-1</i>      | carboxythiazole phosphate tautomerase                                                                                  |
| Pcar_0607                                                                       | <i>tenI-2</i>      | carboxythiazole phosphate tautomerase                                                                                  |
| Pcar_2235                                                                       | <i>thiE, thiD</i>  | 4-amino-5-hydroxymethyl-2-methylpyrimidine-phosphate kinase and thiamin monophosphate synthase                         |
| Pcar_0028                                                                       | <i>thiL</i>        | thiamin monophosphate kinase                                                                                           |
| Pcar_0035                                                                       |                    | thiamin biosynthesis protein ApbE                                                                                      |
| <b>Common enzymes of cobalamin/siroheme/heme biosynthesis</b>                   |                    |                                                                                                                        |
| Pcar_3064                                                                       | <i>hemA</i>        | glutamyl-tRNA reductase                                                                                                |
| Pcar_0266                                                                       | <i>hemL</i>        | glutamate-1-semialdehyde 2,1-aminomutase                                                                               |
| Pcar_3061                                                                       | <i>hemB</i>        | porphobilinogen synthase                                                                                               |
| Pcar_3063                                                                       | <i>hemC</i>        | hydroxymethylbilane synthase                                                                                           |
| Pcar_3062                                                                       | <i>hemD</i>        | uroporphyrinogen III C2,C7-methyltransferase and uroporphyrinogen III synthase                                         |
| <b>Cobalamin biosynthesis</b>                                                   |                    |                                                                                                                        |
| Pcar_3066                                                                       | <i>cysG-1</i>      | precorrin-2 dehydrogenase and sirohydrochlorin ferrochelatase, putative                                                |
| Pcar_0489                                                                       | <i>cysG-2</i>      | precorrin-2 dehydrogenase, sirohydrochlorin ferrochelatase, and uroporphyrinogen III C2,C7-methyltransferase, putative |
| Pcar_2740                                                                       | <i>cbiX</i>        | sirohydrochlorin cobaltochelatase                                                                                      |
| Pcar_0478                                                                       | <i>cbiK</i>        | sirohydrochlorin cobaltochelatase, putative                                                                            |
| Pcar_0476                                                                       | <i>cbiL</i>        | cobalt-sirohydrochlorin C20-methyltransferase                                                                          |
| Pcar_0484                                                                       | <i>cobD, cbiH-</i> | L-threonine-0-3-phosphate decarboxylase, cobalt-precorrin-                                                             |

|           |                |                                                                                    |
|-----------|----------------|------------------------------------------------------------------------------------|
|           | <i>1, cbiP</i> | 3 <i>C17</i> -methyltransferase and adenosylcobyrinic acid synthase                |
| Pcar_0471 | <i>cbiH-2</i>  | cobalt-precorrin-3 <i>C17</i> -methyltransferase                                   |
| Pcar_0473 | <i>cbiF</i>    | cobalt-precorrin-4 <i>C11</i> -methyltransferase                                   |
| Pcar_0472 | <i>cbiG</i>    | cobalt-precorrin-5A hydrolase                                                      |
| Pcar_0475 | <i>cbiD</i>    | cobalt-precorrin-5B <i>C1</i> -methyltransferase                                   |
| Pcar_0470 | <i>cbiJ</i>    | precorrin-6A reductase                                                             |
| Pcar_2739 | <i>cbiET</i>   | cobalt-precorrin-6B <i>C5,C15</i> -methyltransferase and <i>C12</i> -decarboxylase |
| Pcar_0474 | <i>cbiE</i>    | cobalt-precorrin-6B <i>C5</i> -methyltransferase, putative                         |
| Pcar_0480 | <i>cbiC</i>    | cobalt-precorrin-8X methylmutase                                                   |
| Pcar_0481 | <i>cbiA</i>    | cob(II)yrinate a,c-diamide synthase                                                |
| Pcar_0482 | <i>cobA-1</i>  | cob(I)yrinate a,c-diamide adenosyltransferase                                      |
| Pcar_3106 | <i>cobA-2</i>  | cob(I)yrinate a,c-diamide adenosyltransferase                                      |
| Pcar_0483 | <i>cbiB</i>    | adenosylcobinamide-phosphate synthase                                              |
| Pcar_0487 | <i>cobU</i>    | adenosylcobinamide kinase and adenosylcobinamide phosphate guanylyltransferase     |
| Pcar_0486 | <i>cobT</i>    | nicotinate-nucleotide--dimethylbenzimidazole phosphoribosyltransferase             |
| Pcar_0485 | <i>cobS</i>    | cobalamin-5'-phosphate synthase                                                    |
| Pcar_2741 | <i>cobC-1</i>  | adenosylcobalamin-5'-phosphate phosphatase, putative                               |
| Pcar_0229 | <i>cobC-2</i>  | adenosylcobalamin-5'-phosphate phosphatase, putative                               |
| Pcar_0488 | <i>cobC-3</i>  | adenosylcobalamin-5'-phosphate phosphatase, putative                               |
